# Supplementary material for: Enzymatic Preparation of l-Malate in a Reaction System with Product Separation and Enzyme Recycling
Source: MDPI journal article supplement (doi:10.3390/catal12060587), 2022-05-27
Supplement: s1 [file s1]

# Enzymatic preparation of L-malate in a reaction system with product separation and enzyme recycling

**Guosi Li <sup>1,\*</sup>, Fucheng Zhu <sup>1</sup>, Fangli Gu <sup>1</sup>, Xinjian Yin <sup>2</sup>, Qilin Xu <sup>1</sup>, Menghua Ma <sup>1</sup>, Li Zhu <sup>3</sup>, Baowei Lu <sup>1</sup> and Naidong Chen <sup>1,\*</sup>**

<sup>1</sup> Anhui Engineering Laboratory for Conservation and Sustainable Utilization of Traditional Chinese Medicine Resources, Department of Biological and Pharmaceutical Engineering, West Anhui University, Lu'an 237012, Anhui, China; 02000138@wxc.edu.cn (F.Z.); 02000093@wxc.edu.cn (F.G.); 02000171@wxc.edu.cn (B.L.); 02000181@wxc.edu.cn (Q.X.); 02000174@wxc.edu.cn (M.M.)

<sup>2</sup> School of Marine Science, Sun Yat-sen University, Zhuhai 519080, China; yinxj5@mail.sysu.edu.cn (X.Y.)

<sup>3</sup> Key Laboratory of Biomass Chemical Engineering of Ministry of Education, College of Chemical and Biological Engineering, Zhejiang University, Hangzhou 310027, China; 11628066@zju.edu.cn

\* Correspondence: 02000159@wxc.edu.cn (G.L.); hsjx@wxc.edu.cn (N.C.)

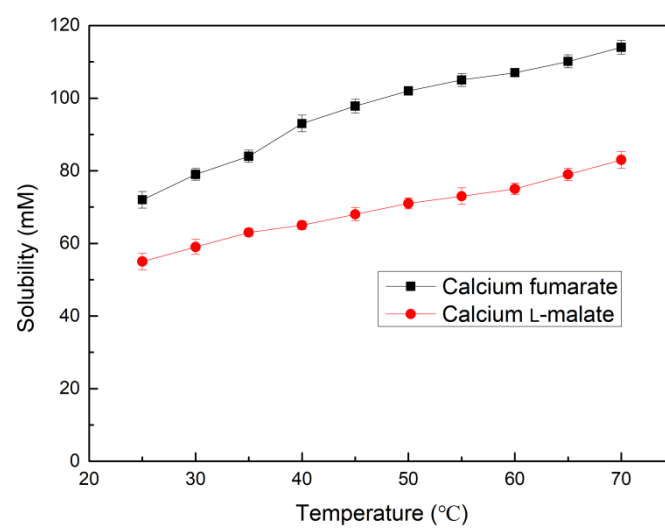

**Figure S1.** Solubility of calcium fumarate and calcium L-malate at different temperatures.
